# Supplementary material for: Oxydifficidin, a potent Neisseria gonorrhoeae antibiotic due to DedA-assisted uptake and ribosomal protein RplL sensitivity
Source: eLife journal article supplement (doi:10.7554/elife.99281), 2024-08-01

Assay Class: Eukaryote Total RNA Nano  
Data Path: C:\... expert\data\Eukaryote Total RNA Nano\_2023-09-29\_Jingbo.xad

Created: 9/29/2023 2:51:54 PM  
Modified: 9/29/2023 3:16:32 PM

**Gel Image**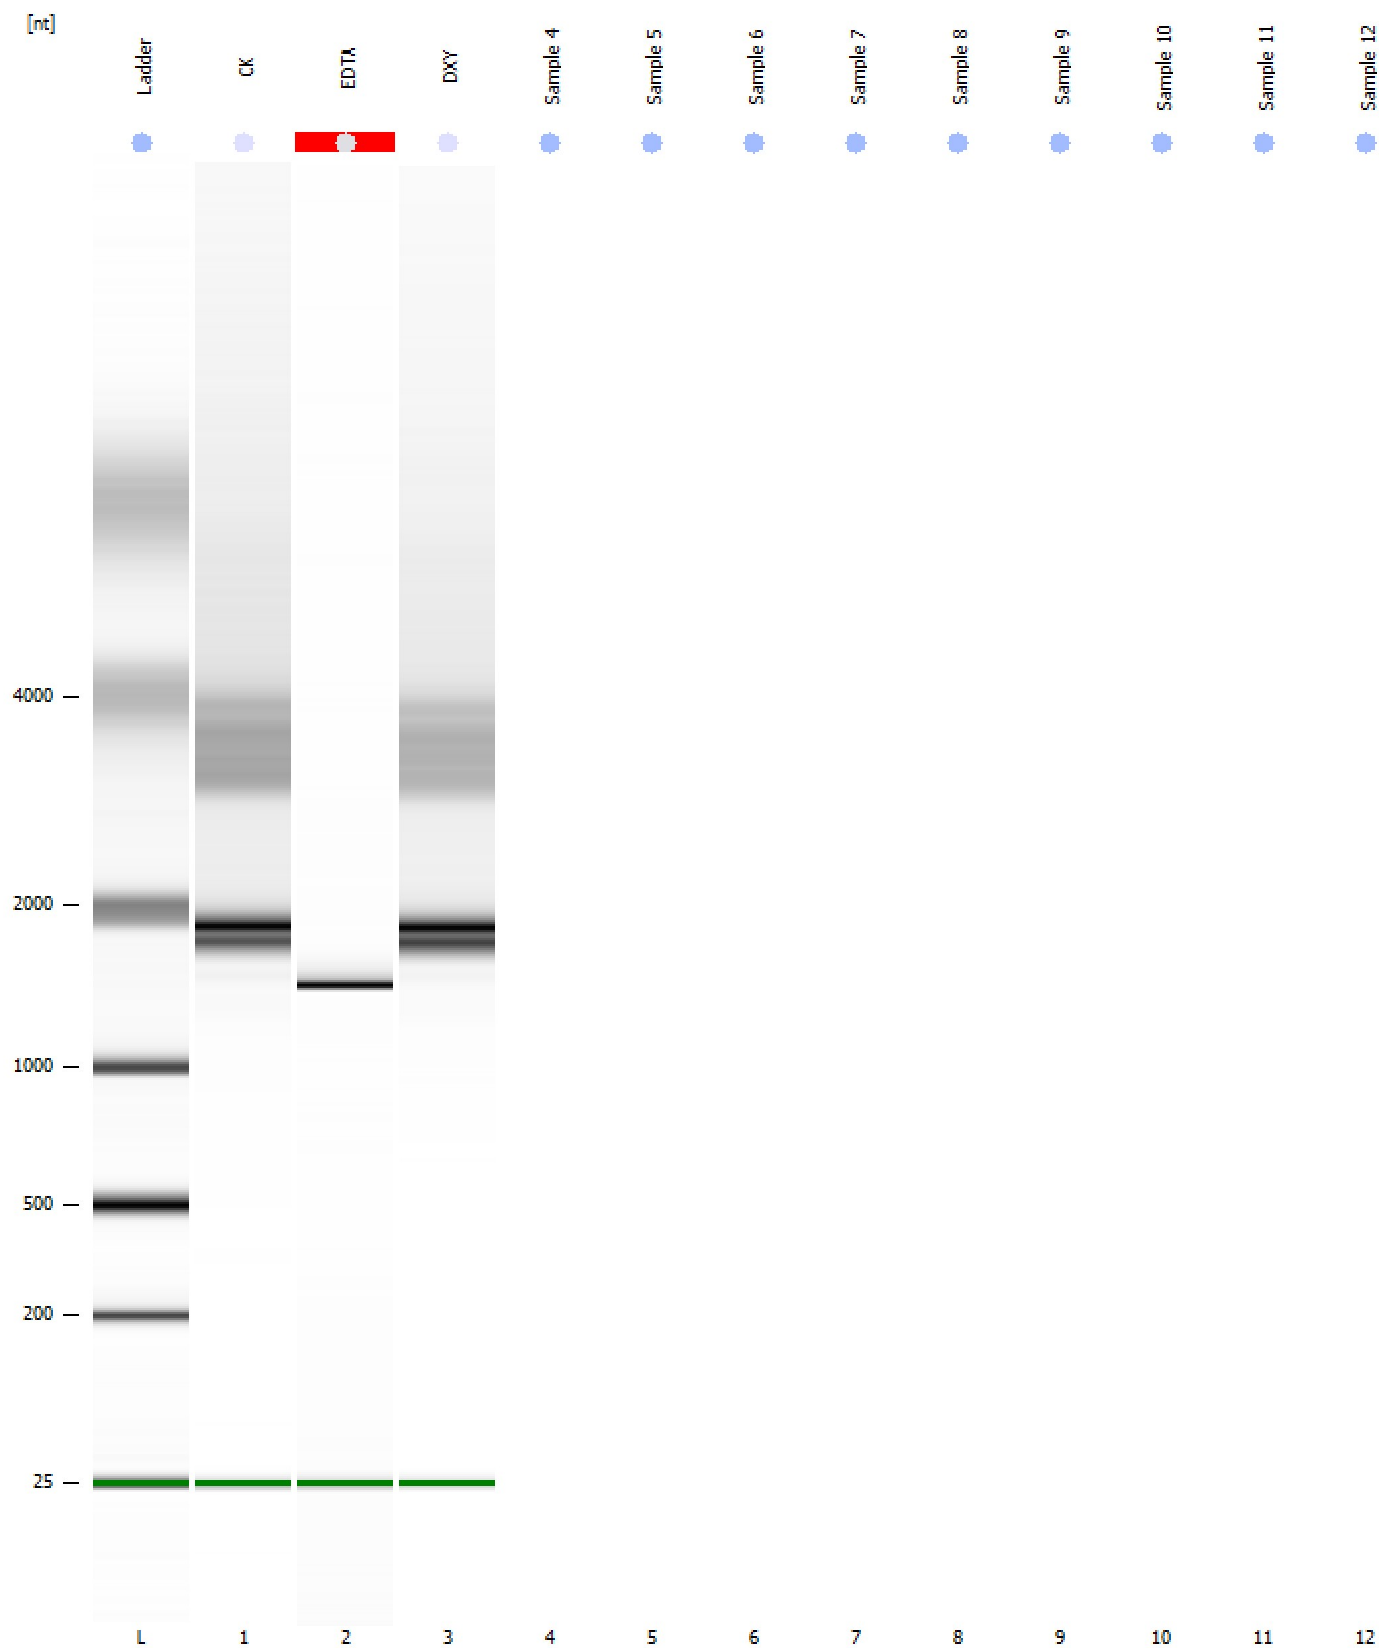

Supplement: fig3-data3 [file elife-99281-fig3-data3-v1.zip]
