# Supplementary material for: Oxydifficidin, a potent Neisseria gonorrhoeae antibiotic due to DedA-assisted uptake and ribosomal protein RplL sensitivity
Source: eLife. 2025 May 28;13:RP99281. doi: 10.7554/eLife.99281 (PMC12119084; doi:10.7554/eLife.99281)
Supplement: Supplementary file 1. [file elife-99281-supp1.xlsx]

## Sheet: Supplementary file 1
Supplementary file 1. Activity of oxydifficidin against of Neisseria mutants.
Organism	MIC (μg/ml)*
N. gonorrhoeae MS11	0.25
N. gonorrhoeae MS11 ∆dedA	2
N. gonorrhoeae MS11 ∆dedA rplL_R76C	16
N. gonorrhoeae MS11 ∆dedA rplL_K84E	16
N. cinerea ATCC 14685	2
N. cinerea ATCC 14685 rplL_K84E	16
N. subflava NJ 9703	8
N. subflava NJ 9703 dedA_I59-D82Del	64
N. subflava NJ 9703 dedA_A78-K212Del	64
N. subflava NJ 9703 dedA_A160V	64
N. subflava NJ 9703 dedA_L53-K212Del	64
N. subflava NJ 9703 dedA_Q22*	64
N. subflava NJ 9703 dedA_G49S	64
N. subflava NJ 9703 dedA_C37*	64
*n=2
