# Supplementary material for: Oxydifficidin, a potent Neisseria gonorrhoeae antibiotic due to DedA-assisted uptake and ribosomal protein RplL sensitivity
Source: eLife. 2025 May 28;13:RP99281. doi: 10.7554/eLife.99281 (PMC12119084; doi:10.7554/eLife.99281)
Supplement: Supplementary file 2. [file elife-99281-supp2.xlsx]

## Sheet: Supplementary file 2
Supplementary file 2. 1H and 13C NMR data of oxydifficidin (800 MHz, 298 K, CD3OD - D2O (1:1))
Position	Type	13C	1H	multiplicity, J (Hz)
1	C	174.1	-
2	CH2	42.3 a	3.22	d, 15.5
		b	2.93	d, 15.5
3	C	145.2	-
3-CH2	CH2	113.9 a	4.97	s
		b	4.84	s
4	CH	47.2	2.5	m
4-CH3	CH3	16.5	1.16	d, 7.2
5	CH	75.7	4.31	br t, 3.5
6	CH	137.3	5.8	dd, 5.5; 15.0
7	CH	125.4	6.75	dd, 11.6; 14.9
8	CH	129.3	6.02	m
9	CH	125.4	6.39	t, 11.4
10	CH	125.4	6.47	t, 11.4
11	CH	134.2	5.41	dt, 5.9; 10.0; 10.0
12	CH2	26.7 a	2.64	m
		b	2.04	m
13	CH2	24.8 a	1.67	m
		b	1.32	m
14	CH2	34.2 a	1.71	br
		b	1.42	m
15	CH	73.1	5.22	dt, 6.3; 8.2; 8.2
16	C	141.8	-	-
16-CH3	CH3	18.9	1.81	s
17	CH	121.7	6.02	m
18	CH	128	6.33	t, 11.5
19	CH	124.8	5.16	dt, 5.3; 11.0; 11.0
20	CH2	31.5 a	2.51	m
		b	2.25	dt, 4.0; 4.0; 14.5
21	CH	75.4	4.86	m
22	CH2	31.7 a	1.63	m
		b	1.5	m
23	CH2	36.6	2	m
24	C	139.2	-	-
24-CH3	CH3	16.7	1.72	s
25	CH	126.9	5.77	d, 8.2
26	CH	134.5	6.56	dt, 10.3; 10.3; 16.7
27	CH2	115.5 a	5.05	dd, 1.7; 16.7
		b	4.97	dd. 1.7, 10.3
13C NMR chemical shifts were obtained by the interpretation of 13C, HSQC and HMBC experiments.
