# Supplementary material for: Oxydifficidin, a potent Neisseria gonorrhoeae antibiotic due to DedA-assisted uptake and ribosomal protein RplL sensitivity
Source: eLife. 2025 May 28;13:RP99281. doi: 10.7554/eLife.99281 (PMC12119084; doi:10.7554/eLife.99281)
Supplement: Supplementary file 3. [file elife-99281-supp3.xlsx]

## Sheet: Supplementary file 3
Supplementary file 3. Primer Sequences used in this study.
Amplicon	Primer	Sequence (5’-3’)
dedA 5’ overhang	F	CCCTTTCTGCCTGTACTTCGACTCAAG
	R	CATAAAGTGTCAAGCCCTCGAGGGGTTTTCCAAAACACAATGTCGAGG
dedA 3’ overhang	F	GCCGTCTGAAGTTTAAACATCGATTTGTTGGAAATTGACATTATGAATATATTATCCG
	R	CTTGGTAATCGCGCAACAGATCTTCAAGC
trpB-lga 5’ overhang	F	AACGCCATCGGTTTGTTCTATC
	R	TAAAGTGTCAAGCCCTCGAGGAGTCAAGCTTCGGACGGCATTTT
trpB-lga 3’ overhang	F	GCCGTCTGAAGTTTAAACATCGTTCAGACGGCATTTTATTTTGC
	R	CTTGAGAAGCCGGTTACAAACG
rplL_R76C	F	GTGCAACTGGGAAACAATCACA
	R	GTCTTTTTAGGTTACCGCGCTG
kanR cassette	F	CTCGAGGGCTTGACACTTTATG
	R	ATCGATGTTTAAACTTCAGACGGC
